# Supplementary material
Source: publisher site journal article supplement (https://www.dovepress.com/article/239205)
Supplement: Supplementary file 1 [file get_supplementary_file.php]

**SUPPLEMENTARY MATERIAL**

**Supplementary** **Table 1** Additional resources used in the literature search that identified relevant congress websites and robust SLRs/meta-analyses

| **Congress websites** | |
| --- | --- |
| **Congress** | **Website** |
| International Society for Pharmacoeconomics and Outcomes Research | <http://www.ispor.org/meetings/MeetingsIndex.aspx> |
| American College of Gastroenterology | <http://gi.org/> |
| Digestive Disease Week | <http://www.ddw.org/home/> |
| **Source papers for SLRs reference lists** | |
| Garnock-Jones KP. Prucalopride: a review in chronic idiopathic constipation. *Drugs.* 2016;76(1):99–110. | |
| Hatswell AJ, Vegter S. Measuring quality of life in opioid-induced constipation: mapping EQ-5D-3 L and PAC-QOL. *Health Econ Rev.* 2016;6(1):14. | |
| Koh CE, Young CJ, Young JM, Solomon MJ*.* Systematic review of randomized controlled trials of the effectiveness of biofeedback for pelvic floor dysfunction. *Br J Surg.* 2008;95(9):1079–1087. | |
| Pare P, Fedorak RN. Systematic review of stimulant and nonstimulant laxatives for the treatment of functional constipation. *Can J Gastroenterol Hepatol.* 2014;28(10):549–557. | |
| Patel AS, Saratzis A, Arasaradnam R, Harmston C. Use of antegrade continence enema for the treatment of fecal incontinence and functional constipation in adults: a systematic review. *Dis Colon Rectum.* 2015;58(10):999–1013. | |
| Rao S, Weber HC. New treatment targets for the management of irritable bowel syndrome. *Curr Opin Endocrinol Diabetes Obes.* 2014;21(1):9–14. | |
| Riedl A, Schmidtmann M, Stengel A, et al*.* Somatic comorbidities of irritable bowel syndrome: a systematic analysis. *J Psychosom Res.* 2008;64(6):573–582. | |
| Saad R, Chey WD. Lubiprostone for chronic idiopathic constipation and irritable bowel syndrome with constipation. *Expert Rev Gastroenterol Hepatol.* 2008;2(4):497–508. | |
| Spinzi G, Amato A, Imperiali G, et al*.* Constipation in the elderly: management strategies. *Drugs Aging.* 2009;26(6):469–474. | |
| Suares NC, Ford AC. Prevalence of, and risk factors for, chronic idiopathic constipation in the community: systematic review and meta-analysis. *Am J Gastroenterol.* 2011;106(9):1582–1591. | |
| Thomas RH, Luthin DR. Current and emerging treatments for irritable bowel syndrome with constipation and chronic idiopathic constipation: focus on prosecretory agents. *Pharmacotherapy.* 2015;35(6):613–630. | |
| Wald A, Sigurdsson L. Quality of life in children and adults with constipation. *Best Pract Res Clin Gastroenterol.* 2011;25(1):19–27. | |
| Woodward S, Norton C, Chiarelli P. Biofeedback for treatment of chronic idiopathic constipation in adults. *Cochrane Database Syst Rev.* 2014;26(3):Cd008486. | |

**Abbreviation:** SLR, systematic literature review.

**Supplementary** **Table 2** Inclusion and exclusion criteria for the SLRs on the humanistic and economic burden of CIC

| **Criterion** | **Included** | **Excluded** |
| --- | --- | --- |
| Population | Adult patients ≥18 years old described by the study authors as having CIC or chronic FC | Patients with constipation or chronic constipation in which the authors do not describe the population as having CIC or chronic FC  Children and adolescents |
| Outcomes (HRQoL) | Results from validated, multidimensional, generic, or disease-specific HRQoL measures, ie, PAC-QOL, SF-36, SF-12, and NHP | Clinician-reported outcomes  Observer-reported outcomes  Performance-based outcomes  Symptom assessments  Utility assessments  Measures that assess only a single domain of HRQoL (eg, depression/anxiety, physical functioning)  Global assessments of change (patient- or clinician-reported)  Laboratory outcomes  Economic outcomes  Investigator-developed outcomes (such as individual items or questionnaires developed for a specific study/studies and not further validated) |
| Outcomes (economic burden) | Direct healthcare resource utilization and/or costs  Medications  Laboratory assessments  Diagnostic procedures  Physician or other provider outpatient visits and services  Emergency department visits  Inpatient hospitalizations  Hospital readmissions  Patient out-of-pocket costs  Indirect costs  Patient work productivity loss  Absenteeism from work or school  Disability payments (eg, payments made by third parties to patients disabled with CIC or chronic FC) | No specific exclusion criteria |
| Study type | Prospective, retrospective, cross-sectional studies  Clinical trials  Systematic reviewsa  Modelling studies  Other study types (eg, Delphi panels) | Commentaries and letters (publication type)  Consensus reports  Non-systematic reviews  Articles mentioning HRQoL effects of CIC that are not based on data (eg, commentaries making general reference to humanistic burden)  Articles reporting cost estimates that are not based on data (eg, commentaries making general reference to costs) |
| Conference abstractsb | Abstracts presented from 2015 to present | Abstracts presented before 2015 |
| Geographical location | Studies conducted in the USA only | Non-US studies |

**Notes:** When it was unclear whether a study met a criterion during level 1 screening, the study was progressed to full-text screening to confirm whether it met the inclusion criteria. aSystematic reviews were included at level 1 screening to identify primary studies and then excluded at level 2 screening. bNo date restriction was placed on abstracts in the electronic database searches in which abstracts are included in search results (Embase and BIOSIS). The date restriction was applied during level 2 screening.

**Abbreviations:** CIC, chronic idiopathic constipation; FC, functional constipation; HRQoL, health-related quality of life; NHP, Nottingham Health Profile; PAC-QOL, Patient Assessment of Constipation Quality of Life questionnaire; SF-12, 12-item Short-Form Health Survey; SF-36, 36-item Short-Form Health Survey; SLR, systematic literature review.
